# Supplementary material for: Enhanced ion transport in densified CNT arrays
Source: Royal Society of Chemistry journal article supplement (doi:10.1039/c8ta02570c), 2018-01-01
Supplement: c8ta02570c1.pdf [file c8ta02570c1.pdf]

---

*Electronic supplementary information for*

---

## **Enhanced Ion Transport in Densified CNT Arrays**

Shenglin Zhou,<sup>a</sup> Jiadong Sheng,<sup>a</sup> Zhaohui Yang,<sup>\*abc</sup> Xiaohua Zhang<sup>\*abc</sup>

<sup>a</sup> College of Physics, Optoelectronics and Energy, Soochow University, Suzhou, 215006, P.R. China

<sup>b</sup> Jiangsu Key Laboratory of Thin Films, Soochow University, Suzhou 215006, P.R. China

<sup>c</sup> Center for Soft Condensed Matter Physics and Interdisciplinary Research, Soochow University, Suzhou, 215006, P.R. China

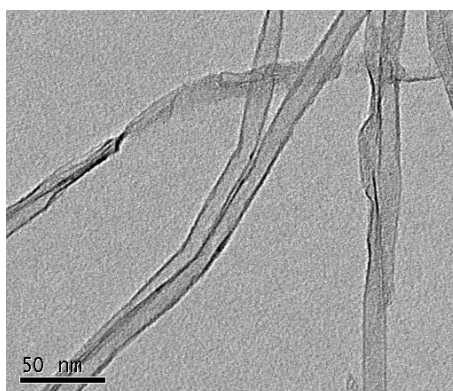

**Figure S1.** TEM image of DCNTA.

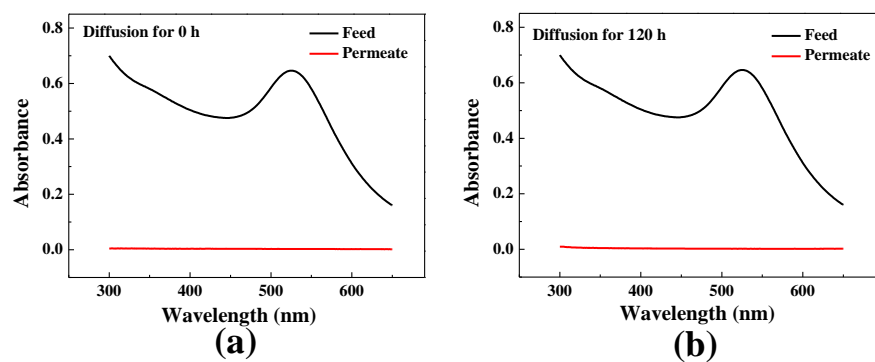

**Figure S2.** UV spectra before (a) and after (b) 120 h diffusion of 20 nm Au nanoparticle colloid in densified CNT array.

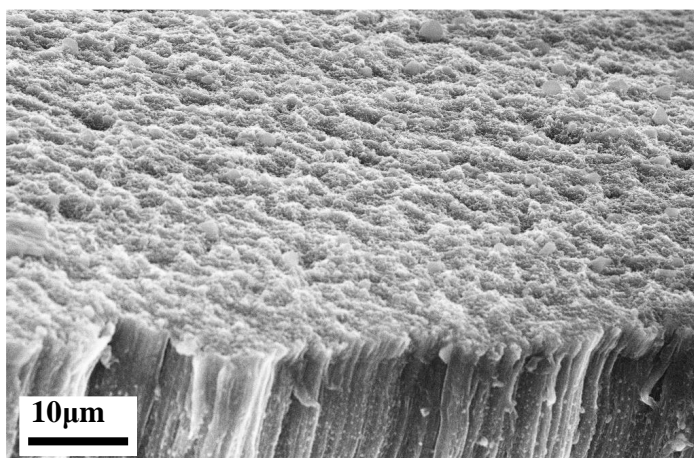

**Figure S3.** The low-magnification SEM image of CNT membrane.

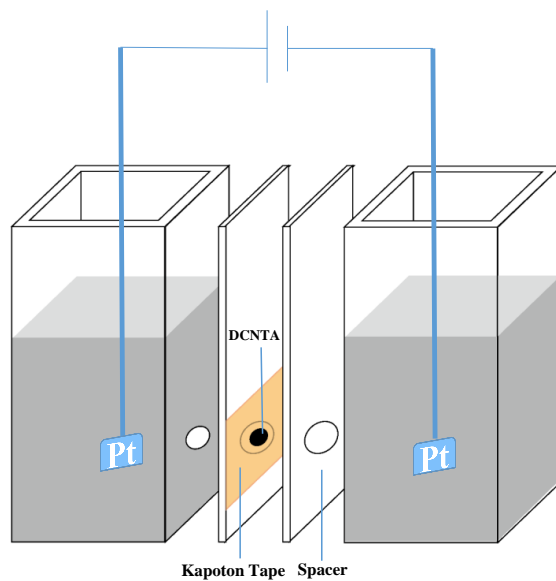

**Figure S4.** Schematic of experimental setup of an electric activation treatment.

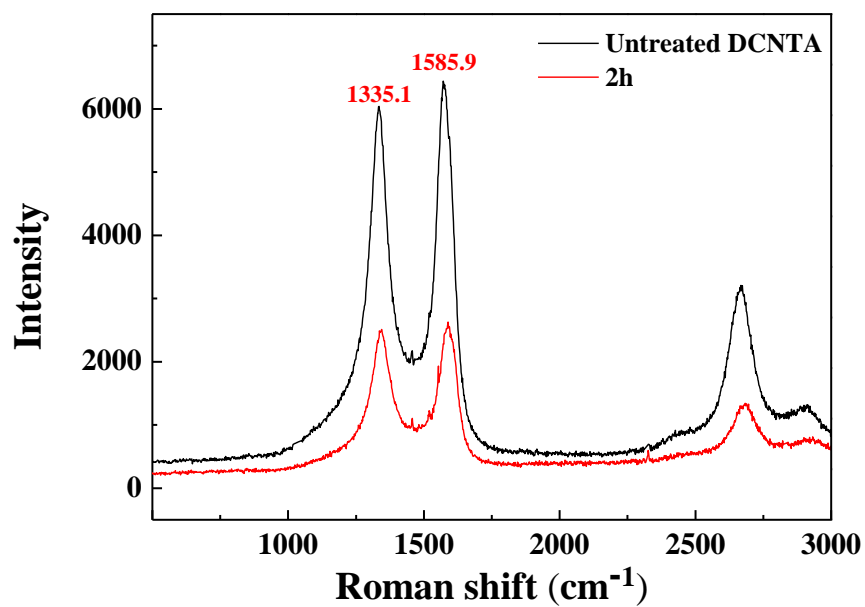

**Figure S5.** Raman spectra of untreated DCNTA and electrically activated DCNTA at 7 V for 2 h.

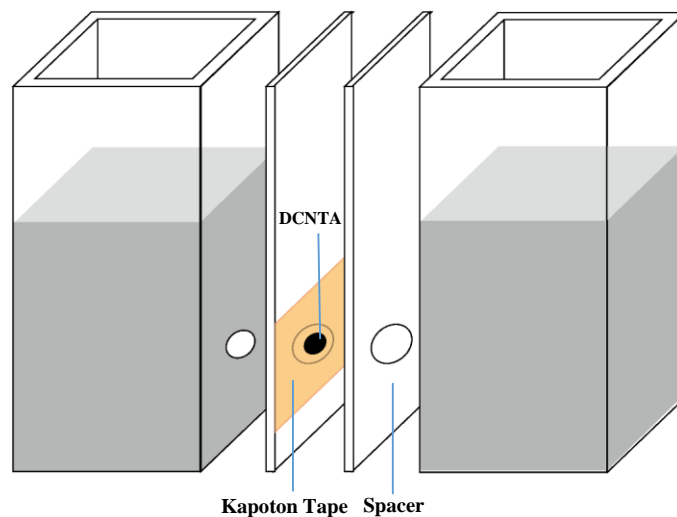

**Figure S6.** The schematic of ion or Au nanoparticle colloid diffusion measurement setup.

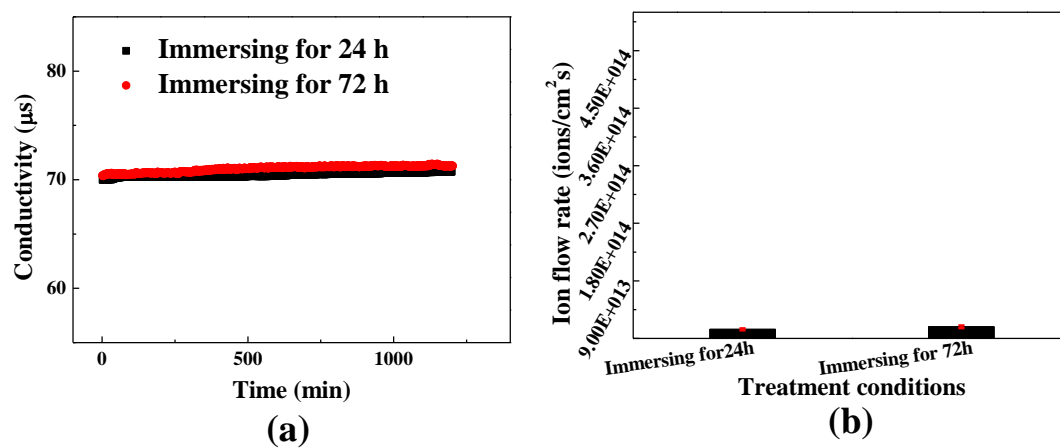

**Figure S7.** Conductivities of the permeate solution and ion flow rates for untreated DCNTAs after these untreated DCNTAs were immersed in KCl solution for 24 h and 72 h.

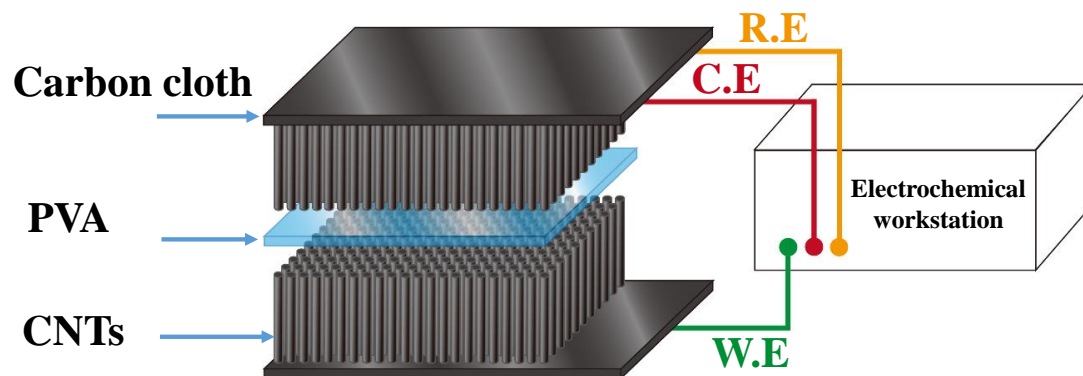

**Figure S8.** Schematic of electrochemical measurement setup.

13.7°

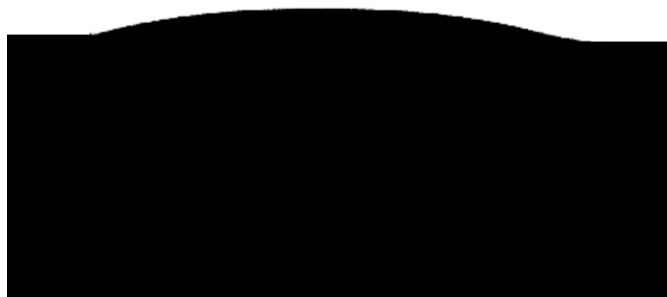

**Figure S9.** Contact angle image of DCNTA after a 40 min plasma treatment.

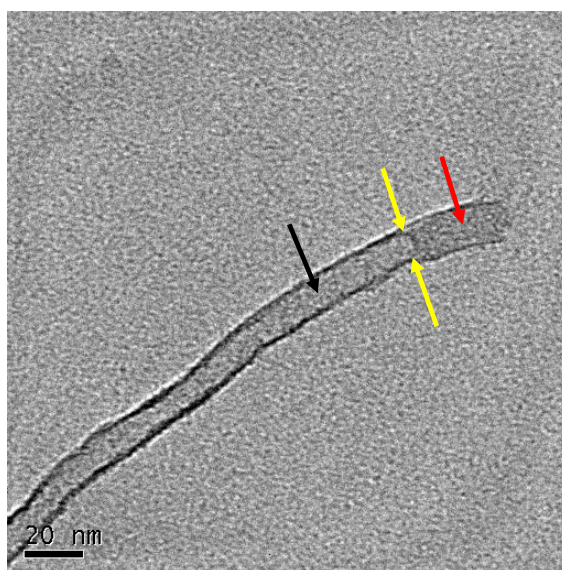

**Figure S10.** TEM image of plasma-treated DCNTA after a 4 h electric activation treatment at 7 V.

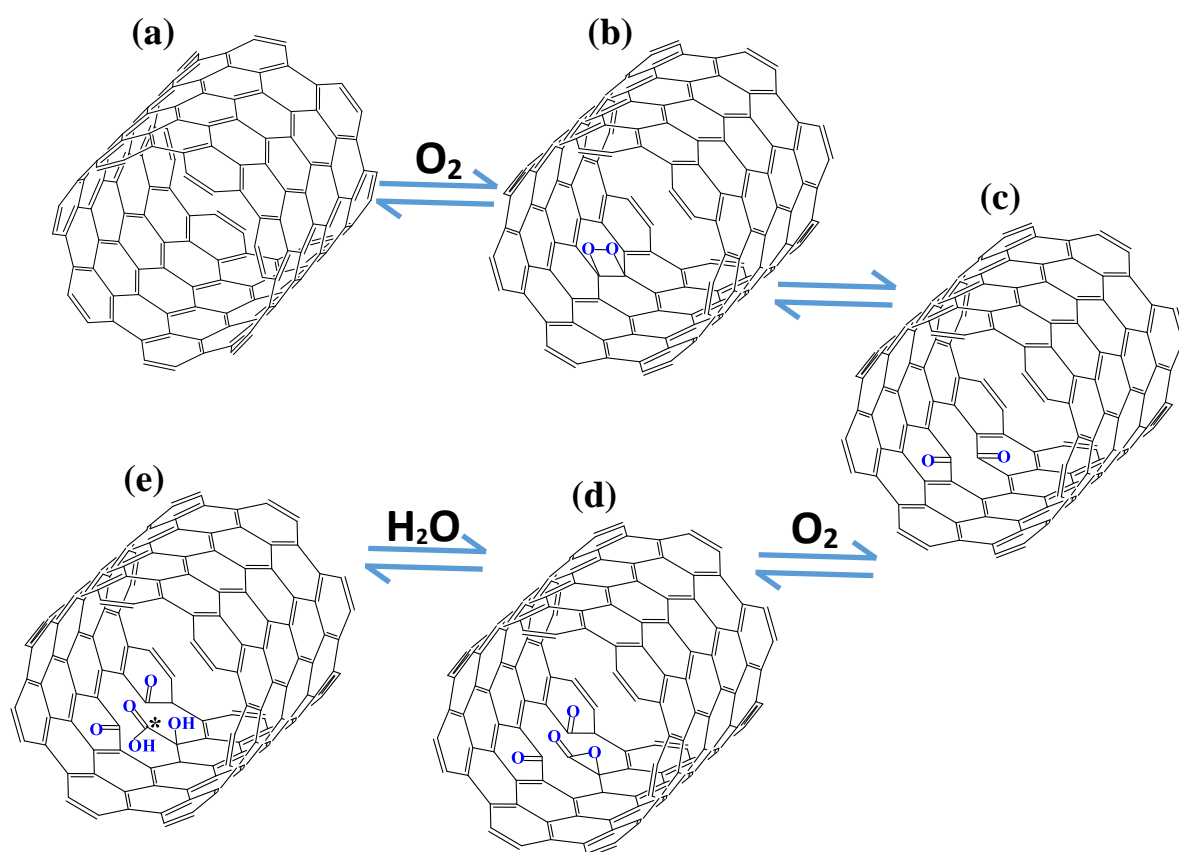

**Scheme S1.** Schematics of the oxidation of carbon nanotubes during a voltage application.

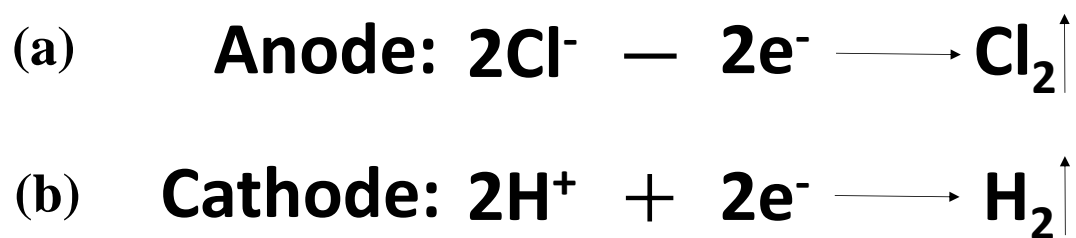

**Scheme S2.** Schematics of electrochemical reactions on the surface of anode and cathode in KCl solution.
